# Supplementary material for: The Spatiotemporal Dynamics of Cerebral Autoregulation in Functional Magnetic Resonance Imaging
Source: Frontiers journal article supplement (doi:10.3389/fnins.2022.795683), 2022-07-08
Supplement: Data_Sheet_1.pdf [file Data_Sheet_1.pdf]

## 1. Supplementary material

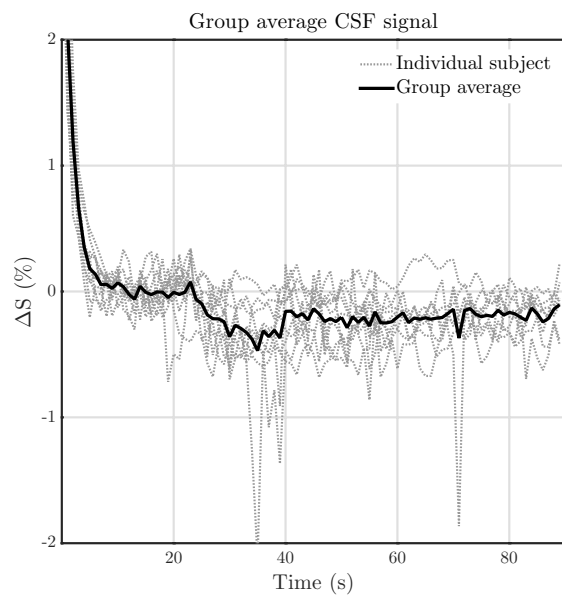

**S1: Group average and individual subject lateral ventricle CSF signals. Following TCR onset (20s), there is evidence of a small and sustained signal reduction, but this has only a very small percentage signal change, and there is significant between subject variability. Thus, removal of the CSF signal as part of ANATICOR does not significantly influence the  $HRF_{TCR}$  results.**

A) Group averaged spatiotemporal response (without  $P_{ET}CO_2$  correction)

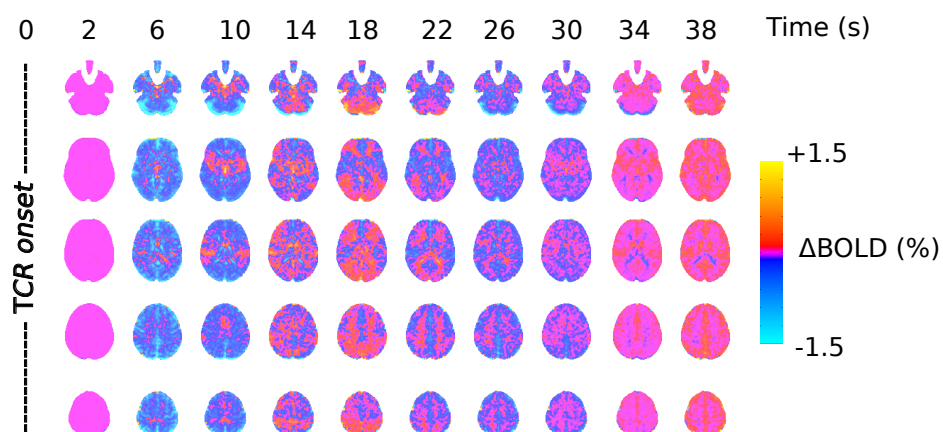

B) Group averaged spatiotemporal response (with  $P_{ET}CO_2$  correction)

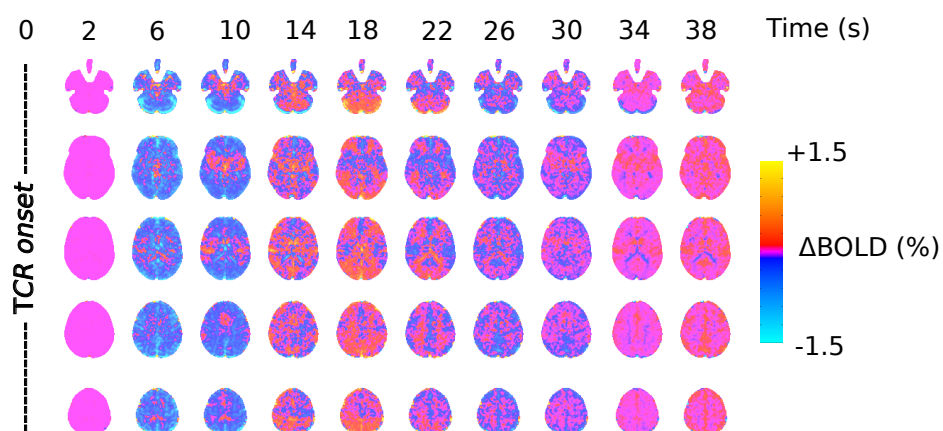

C) Difference in spatiotemporal response (with - without  $P_{ET}CO_2$  correction)

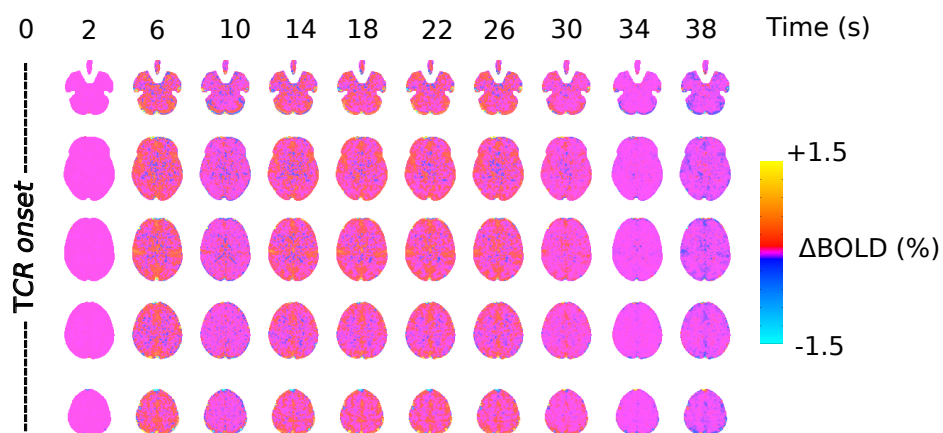

**S2: A) Spatiotemporal dynamics of the  $HRF_{TCR}$  without including  $P_{ET}CO_2$  in model. B) Spatiotemporal dynamics of the  $HRF_{TCR}$  with  $PETCO_2$  included in model. C) Difference due to including  $P_{ET}CO_2$  in model.**

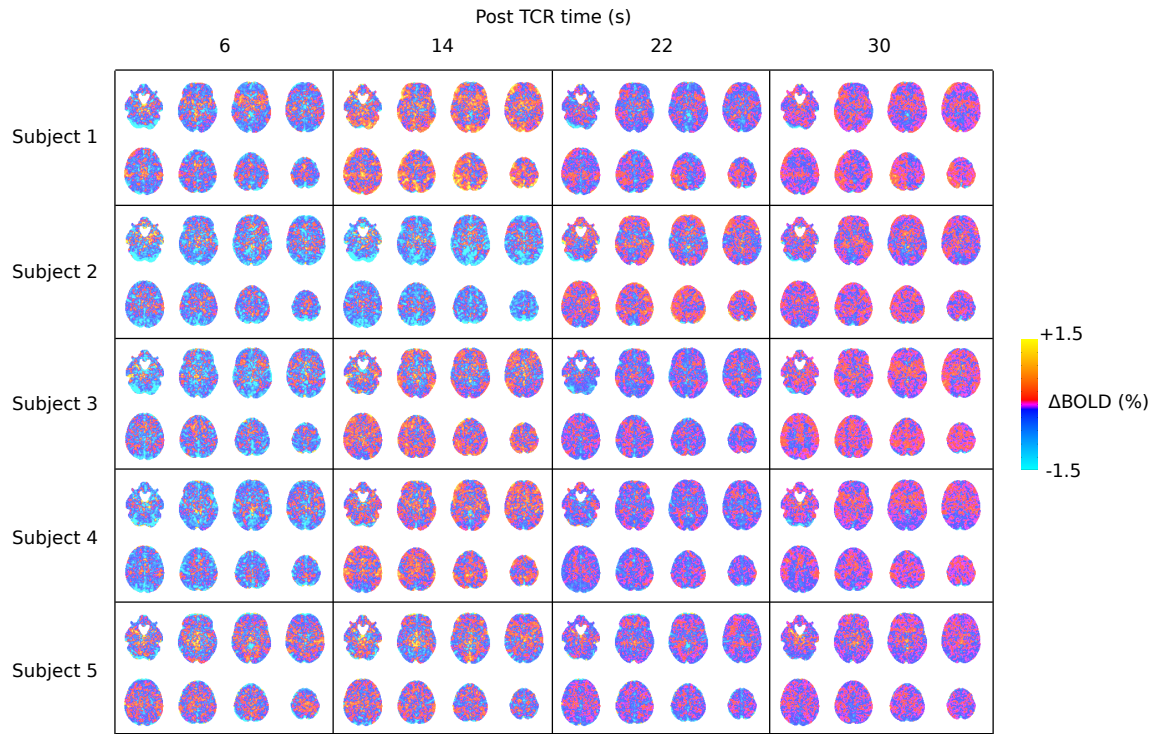

**S3: A presentation of the  $HRF_{TCR}$  at 4 different time points for the first 5 subjects in order to show the between subject agreement in the spatiotemporal dynamics.**

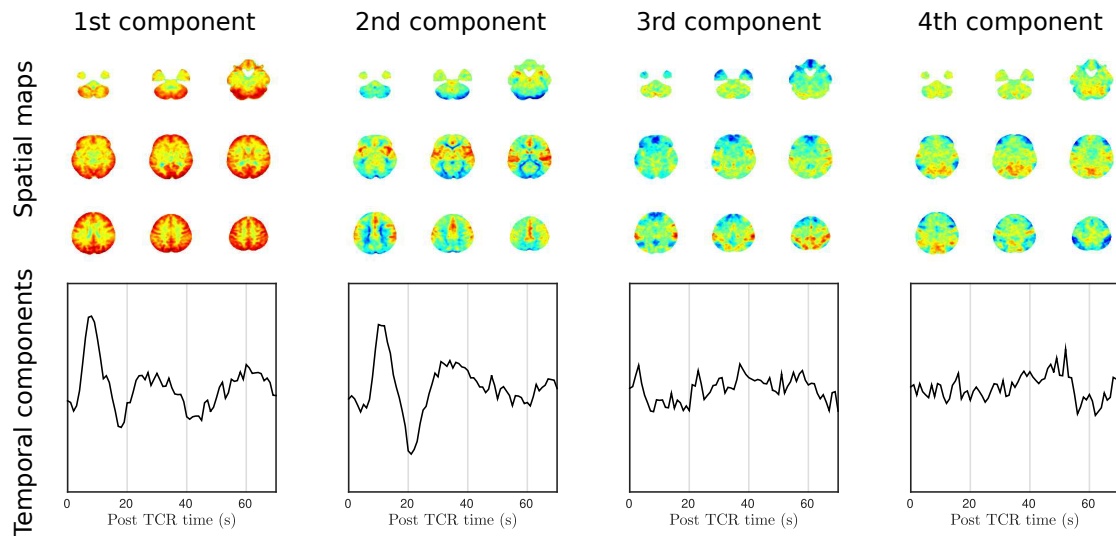

**S4: The spatial maps and time series of the top four components following a PCA decomposition of the group averaged data. N.B. The directionality of the temporal components in the PCA output does not necessarily reflect directionality in the original data.**
